# Supplementary material for: Inhibition of Carbonic Anhydrase 2 Overcomes Temozolomide Resistance in Glioblastoma Cells
Source: MDPI journal article supplement (doi:10.3390/ijms23010157), 2021-12-23
Supplement: s1 [file s1]

Supplementary Materials

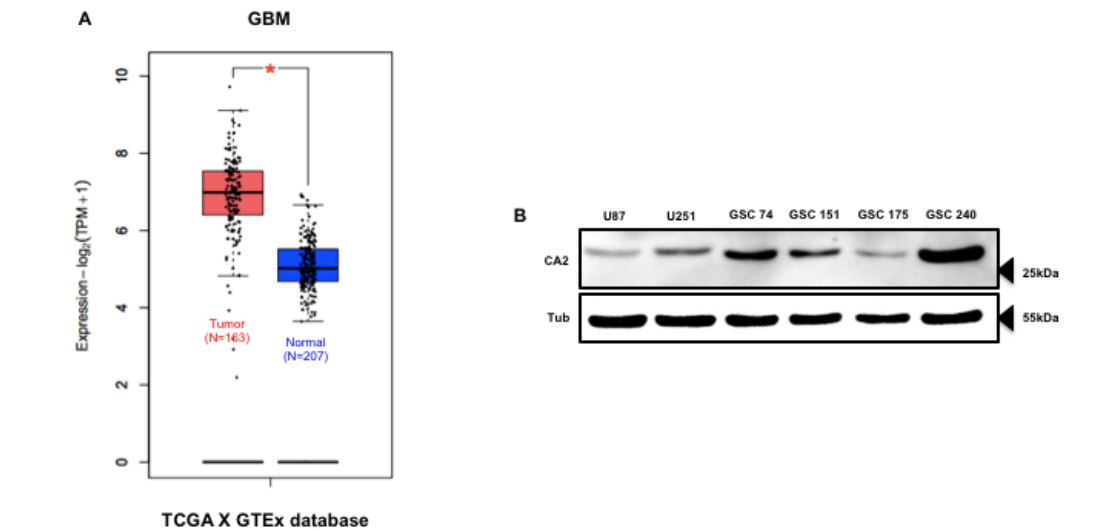

**Figure S1.** CA2 expression in GBM patients, GBM cell lines and GBM stem cells. (A) Expression status of the CA2 gene in GBM tissue compared to normal brain was analyzed from the TCGA and GTEx database. (B) The protein level of CA2 was increased in GSCs compared to U87 and U251 cells. Results were obtained from three independent experiments.

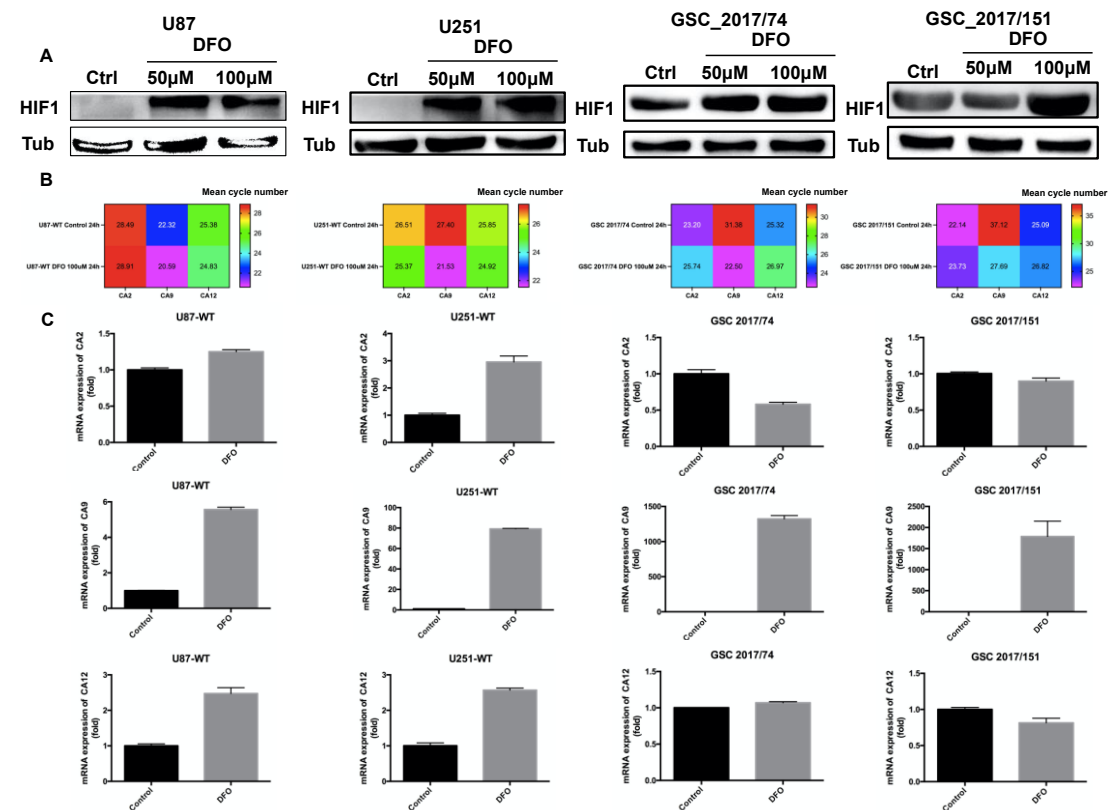

**Figure S2.** Hypoxia induced mRNA expression of GBM-related CA genes CA2, CA9, and CA12. (A) HIF protein expression detected by Western Blot in DFO-induced hypoxia in GBM cell lines (U87 and U251) and GBM stem cells (GSC\_2017/74 and GSC\_2017/151). (B) Mean cycle number values as showed by Heat-

Map representing absolute gene expression levels of CA2, CA9 and CA12 in control cells and DFO stimulate cells. (C) mRNA expression of GBM related carbonic anhydrase genes (CA2, CA9 and CA12) after DFO treatment in GBM cell lines and GBM stem cells were detected by RT-PCR (n=1).

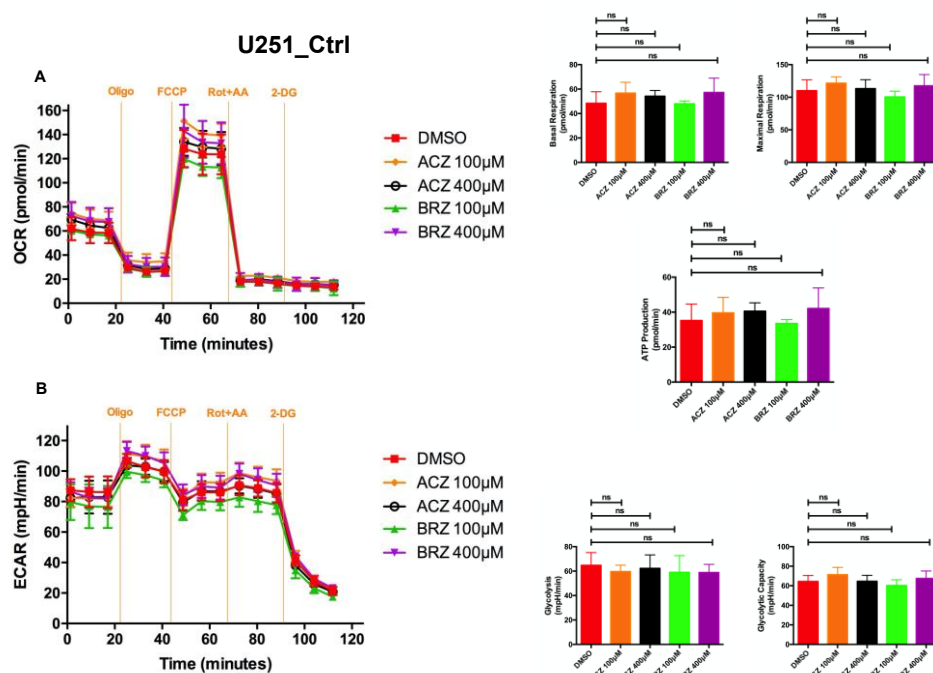

**Figure S3.** U251\_Ctrl cells overall metabolism after ACZ and BRZ stimulation measured by seahorse XFe96 metabolic-flux analyzer. ACZ and BRZ did not change oxidative metabolism (A) and the level of glycolysis rate (B) in U251\_Ctrl cell (n=5-6). All data are presented as mean  $\pm$  SD, One-way ANOVA was used to analyze the data, \*  $P < 0.05$ ; \*\*  $P < 0.01$ ; \*\*\*  $P < 0.001$ , ns: not significant. Results were obtained from three independent experiments.

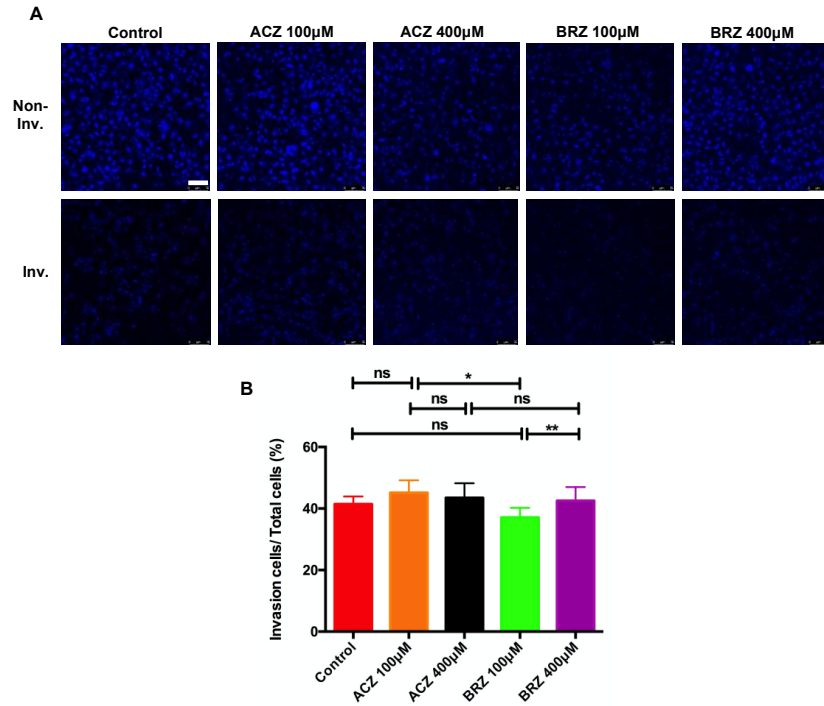

**Figure S4.** U251\_Ctrl cells invasion after ACZ and BRZ treatment. (A) Invasion images of U251\_Ctrl cells stained with nucleus after ACZ and BRZ treatment (scale bar: 50 μm). (B) Quantification of the proportion of invasive cells. ACZ and BRZ did not reduce the invasion of U251\_Ctrl cells (n=6). Results were obtained from three independent experiments. Data are presented as mean ± SD, One-way ANOVA was used to analyze the data, \* P < 0.05; \*\* P < 0.01; \*\*\* P < 0.001, ns: not significant.

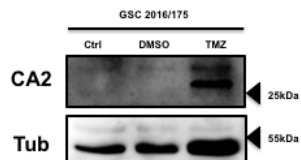

**Figure S5.** Consistent with qPCR result, the protein level CA2 increased in GSC\_TMZ cell compared to GSC\_Ctrl or GSC\_DMSO cells (n=2).

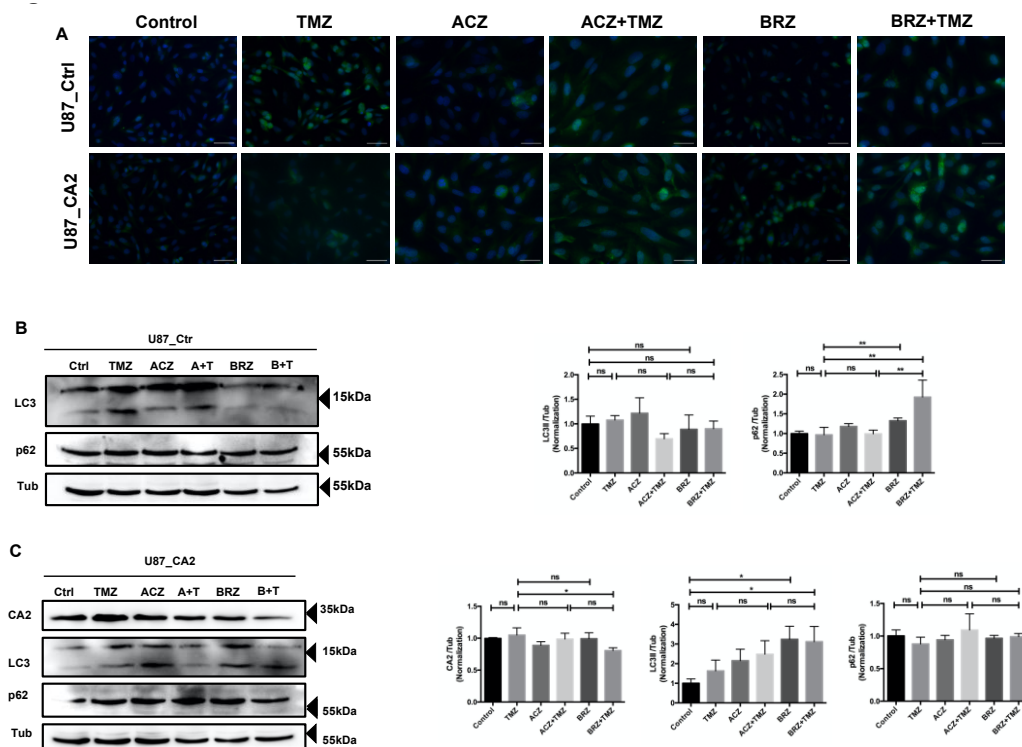

**Figure S6.** Combined administration of BRZ and TMZ enhances autophagy in U87\_CA2 cells. (A) Autophagy marker LC3 ICF staining of U87\_Ctrl and U87\_CA2 cells after TMZ and ACZ/BRZ stimulation for 24h (scale bar: 50  $\mu$ m). (B, C) Western blotting of autophagy-related proteins and CA2 protein in U87\_Ctrl and U87\_CA2 cells with the same treatment as in Fig 4B for 24h. TMZ plus BRZ did not increase the protein expression of LC3II in U87\_Ctrl cells (B), but it increased in U87\_CA2 cells (C). Results were obtained from three independent experiments. Data are presented as mean  $\pm$  SEM, One-way ANOVA was used to analyze the data, \* P < 0.05; \*\* P < 0.01; \*\*\* P < 0.001, ns: not significant.

**Table S1**

| Nr | Sex | Age | Survival (day) | Latency (day) | Tumor location  | Tumor size (mm <sup>3</sup> ) | Histologic grade | MGMT status | EGFR v III | IDH R132H | P53 | Ki76      | Therapy       |
|----|-----|-----|----------------|---------------|-----------------|-------------------------------|------------------|-------------|------------|-----------|-----|-----------|---------------|
| A  | w   | 70  | 392            | 168           | Right parietal  | 22*35*27                      | IV               | +           | -          | -         | ++  | up to 20% | Surgery +TMZ  |
|    |     |     |                |               |                 |                               | IV               | +           | -          | -         | +   | 10%       | +Radiotherapy |
| B  | m   | 67  | 336            | 130           | Right occipital | 30*60                         | IV               | -           | +          | -         | +   | 20%       | Surgery +TMZ  |
|    |     |     |                |               |                 |                               | IV               | -           | +          | -         | +   | 20%       | +Radiotherapy |
| C  | w   | 77  | unknown        | 104           | Left parietal   | 31*26*23                      | IV               | +           | -          | -         | +   | up to 10% | Surgery       |
|    |     |     |                |               |                 |                               | IV               | +           | -          | -         | +   | up to 25% |               |
| D  | m   | 55  | 473            | 191           | Left temporal   | ø 20                          | IV               | -           | -          | -         | +   | 30-40%    | Surgery +TMZ  |
|    |     |     |                |               |                 |                               | IV               | -           | -          | -         | +   | 30-40%    | +Radiotherapy |
| E  | m   | 61  | 627            | 296           | Right temporal  | 34*25*23                      | IV               | +           | -          | -         | ++  | 30%       | Surgery +TMZ  |
|    |     |     |                |               |                 |                               | IV               | +           | -          | -         | ++  | 30%       | +Radiotherapy |
| F  | w   | 63  | unknown        | 385           | Right parietal  | 32*29*23                      | IV               | +           | +          | -         | +   | 25%       | Surgery +TMZ  |
|    |     |     |                |               |                 |                               | IV               |             |            |           |     |           | +Radiotherapy |
| G  | m   | 58  | Alive          | 937           | Left temporal   | 28*42*21                      | IV               | +           | -          | -         | -   | 30%       | Surgery +TMZ  |
|    |     |     |                |               |                 |                               | IV               | +           | -          | -         | +   | >10%      | +Radiotherapy |
| H  | m   | 62  | unknown        | 281           | Left occipital  | 41*61*35                      | IV               | -           | -          | -         | +   | 20%       | Surgery +TMZ  |
|    |     |     |                |               |                 |                               | IV               |             |            |           |     |           | +Radiotherapy |
| I  | w   | 69  | 575            | 470           | Right frontal   | ø 15                          | IV               | +           | -          | -         | +   | 20%       | Surgery +TMZ  |
|    |     |     |                |               |                 |                               | IV               |             |            |           |     |           | +Radiotherapy |
| J  | m   | 44  | 745            | 192           | Right frontal   | 22*28*27                      | IV               | +           | -          | -         | +   | 25%       | Surgery +TMZ  |
|    |     |     |                |               |                 |                               | IV               | -           | -          | -         | +   | 5%        | +Radiotherapy |

**Table S1.** Clinical information on GBM patients used for qPCR of iGBM and rGBM tissue (patient-

matched).

**Table S2**

| Nr | Sex | Age | Survival (day) | Latency (day) | Tumor location               | Histologic grade | MGMT status | EGFR v III | IDH R132H | P53 | Ki76      | Therapy               |
|----|-----|-----|----------------|---------------|------------------------------|------------------|-------------|------------|-----------|-----|-----------|-----------------------|
| A  | w   | 69  | 1277           | 1148          | Right temporal and occipital | IV               | +           | -          | -         | ++  | up to 20% | Surgery +Radiotherapy |
| B  | w   | 66  | 494            | 475           | Left Master ganglia area     | IV               | +           | -          | -         | +   | 10%       | Surgery               |
| C  | m   | 55  | 1624           | 102           | Left frontotemporal          | IV               | +           | -          | -         | +   | 10%       | Surgery +TMZ          |

**Table S2.** Clinical information on patients used for IHC stainings.

**Table S3**

| Isoenzyme            | Acetazolamide Ki (nM) | Brinzolamide Ki (nM) |
|----------------------|-----------------------|----------------------|
| hCA I <sup>‡</sup>   | 250                   | 4.5*10 <sup>4</sup>  |
| hCA II <sup>‡</sup>  | 12                    | 3                    |
| hCA IV <sup>‡</sup>  | 74                    | 3.95*10 <sup>3</sup> |
| hCA IX <sup>‡</sup>  | 25                    | 37                   |
| hCA XII <sup>‡</sup> | 5.7                   | 3                    |

**Note:** <sup>‡</sup> Full-length enzyme.  
<sup>‡</sup> Catalytic domain.

**Table S4**

| Isoenzyme | Acetazolamide | Brinzolamide |
|-----------|---------------|--------------|
| hCA I     | +++           | -            |
| hCA II    | +++           | ++++         |
| hCA IV    | +++           | -            |
| hCA IX    | +++           | -            |
| hCA XII   | +++           | -            |

**Note:** "-" indicates no inhibitory effect.  
 "+" indicates inhibitory effect.  
 Increased inhibition is marked by a higher "+" designation.

**Table S3 and S4.** Inhibitory effects of ACZ and BRZ clinically used drugs against the carbonic anhydrase isoforms. Note that although hCA2 and hCA12 have identical Ki values, the inhibitory profile for hCA12 might be different for Brinzolamide, as the value Ki value in table S3 is derived from the catalytic domain of hCA12 only. In some investigations, Ki values for catalytic domains only and the corresponding full-length carbonic anhydrase can differ by a factor of 30.
